# Supplementary material for: Retrospective clinical and epidemiological analysis of scorpionism at a referral hospital for the treatment of accidents by venomous animals in Alagoas State, Northeast Brazil, 2007-2017
Source: PubMed Central journal article supplement — Rev Inst Med Trop Sao Paulo. 2020 May 11;62:e26. doi: 10.1590/S1678-9946202062026 (PMC7232956; doi:10.1590/s1678-9946202062026), 2020-05-11

## SUPPLEMENTARY MATERIAL

## S.1 - SINAN NOTIFICATION FORM (SNF)

[https://portalsinan.saude.gov.br/images/documentos/Agravos/AAP/Animais\\_Peçonhentos\\_v5.pdf](https://portalsinan.saude.gov.br/images/documentos/Agravos/AAP/Animais_Peçonhentos_v5.pdf)

| República Federativa do Brasil<br>Ministério da Saúde                                                                                                                                                                                                                 |                                                  | SINAN<br>SISTEMA DE INFORMAÇÃO DE AGRAVOS DE NOTIFICAÇÃO<br>FICHA DE INVESTIGAÇÃO |                                       | Nº                                       |
|-----------------------------------------------------------------------------------------------------------------------------------------------------------------------------------------------------------------------------------------------------------------------|--------------------------------------------------|-----------------------------------------------------------------------------------|---------------------------------------|------------------------------------------|
| <b>ACIDENTES POR ANIMAIS PEÇONHENTOS</b>                                                                                                                                                                                                                              |                                                  |                                                                                   |                                       |                                          |
| <b>CASO CONFIRMADO:</b> Paciente com evidências clínicas de envenenamento, específicas para cada tipo de animal, independentemente do animal causador do acidente ter sido identificado ou não.<br>Não há necessidade de preenchimento da ficha para casos suspeitos. |                                                  |                                                                                   |                                       |                                          |
| Dados Gerais                                                                                                                                                                                                                                                          | 1 Tipo de Notificação                            | 2 - Individual                                                                    |                                       |                                          |
|                                                                                                                                                                                                                                                                       | 2 Agravado/doença                                | <b>ACIDENTES POR ANIMAIS PEÇONHENTOS</b>                                          |                                       | 3 Data da Notificação                    |
|                                                                                                                                                                                                                                                                       | 4 UF                                             | 5 Município de Notificação                                                        | Código (CID10)<br>X 29                | Código (IBGE)                            |
|                                                                                                                                                                                                                                                                       | 6 Unidade de Saúde (ou outra fonte notificadora) | Código                                                                            | 7 Data dos Primeiros Sintomas         |                                          |
| Notificação Individual                                                                                                                                                                                                                                                | 8 Nome do Paciente                               |                                                                                   |                                       | 9 Data de Nascimento                     |
|                                                                                                                                                                                                                                                                       | 10 (ou) Idade                                    | 11 Sexo                                                                           | 12 Gestante                           | 13 Raça/Cor                              |
|                                                                                                                                                                                                                                                                       | 14 Escolaridade                                  | 15 Número do Cartão SUS                                                           |                                       |                                          |
|                                                                                                                                                                                                                                                                       | 16 Nome da mãe                                   |                                                                                   |                                       |                                          |
| Dados de Residência                                                                                                                                                                                                                                                   | 17 UF                                            | 18 Município de Residência                                                        | Código (IBGE)                         | 19 Distrito                              |
|                                                                                                                                                                                                                                                                       | 20 Bairro                                        | 21 Logradouro (rua, avenida,...)                                                  |                                       | Código                                   |
|                                                                                                                                                                                                                                                                       | 22 Número                                        | 23 Complemento (apto., casa, ...)                                                 |                                       | 24 Geo campo 1                           |
|                                                                                                                                                                                                                                                                       | 25 Geo campo 2                                   | 26 Ponto de Referência                                                            |                                       | 27 CEP                                   |
|                                                                                                                                                                                                                                                                       | 28 (DDD) Telefone                                | 29 Zona                                                                           | 30 País (se residente fora do Brasil) |                                          |
|                                                                                                                                                                                                                                                                       | <b>Dados Complementares do Caso</b>              |                                                                                   |                                       |                                          |
| Antecedentes Epidemiológicos                                                                                                                                                                                                                                          | 31 Data da Investigação                          | 32 Ocupação                                                                       | 33 Data do Acidente                   |                                          |
|                                                                                                                                                                                                                                                                       | 34 UF                                            | 35 Município de Ocorrência do Acidente:                                           | Código (IBGE)                         | 36 Localidade de Ocorrência do Acidente: |
|                                                                                                                                                                                                                                                                       | 37 Zona de Ocorrência                            | 38 Tempo Decorrido Picada/Atendimento                                             |                                       |                                          |
| Dados Clínicos                                                                                                                                                                                                                                                        | 39 Local da Picada                               |                                                                                   | 40 Manifestações Locais               |                                          |
|                                                                                                                                                                                                                                                                       | 41 Se Manifestações Locais Sim, especificar:     |                                                                                   | 42 Manifestações Sistêmicas           |                                          |
|                                                                                                                                                                                                                                                                       | 43 Se Manifestações Sistêmicas Sim, especificar: |                                                                                   | 44 Tempo de Coagulação                |                                          |
| Dados do Acidente                                                                                                                                                                                                                                                     | 45 Tipo de Acidente                              |                                                                                   | 46 Serpente - Tipo de Acidente        |                                          |
|                                                                                                                                                                                                                                                                       | 47 Aranha - Tipo de Acidente                     |                                                                                   | 48 Lagarta - Tipo de Acidente         |                                          |

|                                |                                                                                 |                         |                                                                                                                                                                                                                                                                                                         |                      |                                                 |                      |
|--------------------------------|---------------------------------------------------------------------------------|-------------------------|---------------------------------------------------------------------------------------------------------------------------------------------------------------------------------------------------------------------------------------------------------------------------------------------------------|----------------------|-------------------------------------------------|----------------------|
| Tratamento                     | <b>49</b> Classificação do Caso<br>1 - Leve 2 - Moderado 3 - Grave 9 - Ignorado |                         | <b>50</b> Soroterapia<br>1 - Sim 2 - Não 9 - Ignorado                                                                                                                                                                                                                                                   |                      |                                                 |                      |
|                                | <b>51</b> Se Soroterapia Sim, especificar número de ampolas de soro:            |                         |                                                                                                                                                                                                                                                                                                         |                      |                                                 |                      |
|                                | Antibotrópico (SAB)                                                             | <input type="text"/>    | Anticrotático (SAC)                                                                                                                                                                                                                                                                                     | <input type="text"/> | Antiaracnídico (SAAr)                           | <input type="text"/> |
|                                | Antibotrópico-laquéético (SABL)                                                 | <input type="text"/>    | Antielapídico (SAE)                                                                                                                                                                                                                                                                                     | <input type="text"/> | Antiloxoscélico (SALox)                         | <input type="text"/> |
| Antibotrópico-crotático (SABC) | <input type="text"/>                                                            | Antiescorpioníco (SAEs) | <input type="text"/>                                                                                                                                                                                                                                                                                    | Antilonômico (SALon) | <input type="text"/>                            |                      |
| Conclusão                      | <b>52</b> Complicações Locais<br>1 - Sim 2 - Não 9 - Ignorado                   |                         | <b>53</b> Se Complicações Locais Sim, especificar: 1 - Sim 2 - Não 9 - Ignorado<br><input type="checkbox"/> Infecção Secundária <input type="checkbox"/> Necrose Extensa <input type="checkbox"/> Síndrome Compartimental <input type="checkbox"/> Déficit Funcional <input type="checkbox"/> Amputação |                      |                                                 |                      |
|                                | <b>54</b> Complicações Sistêmicas<br>1 - Sim 2 - Não 9 - Ignorado               |                         | <b>55</b> Se Complicações Sistêmicas Sim, especificar: 1 - Sim 2 - Não 9 - Ignorado<br><input type="checkbox"/> Insuficiência Renal <input type="checkbox"/> Insuficiência Respiratória / Edema Pulmonar Agudo <input type="checkbox"/> Septicemia <input type="checkbox"/> Choque                      |                      |                                                 |                      |
|                                | <b>56</b> Acidente Relacionado ao Trabalho<br>1 - Sim 2 - Não 9 - Ignorado      |                         | <b>57</b> Evolução do Caso<br>1-Cura 2-Óbito por acidentes por animais peçonhentos 3-Óbito por outras causas 9-Ignorado                                                                                                                                                                                 |                      | <b>58</b> Data do Óbito<br><input type="text"/> |                      |
|                                |                                                                                 |                         | <b>59</b> Data do Encerramento<br><input type="text"/>                                                                                                                                                                                                                                                  |                      |                                                 |                      |

| Acidentes com animais peçonhentos: manifestações clínicas, classificação e soroterapia                                         |                                                                                                                  |                                                                                                                                     |            |       |
|--------------------------------------------------------------------------------------------------------------------------------|------------------------------------------------------------------------------------------------------------------|-------------------------------------------------------------------------------------------------------------------------------------|------------|-------|
| Tipo                                                                                                                           | Manifestações Clínicas                                                                                           | Tipo Soro                                                                                                                           | Nº ampolas |       |
| OFIDISMO                                                                                                                       | <b>Botrópico</b><br><i>jararaca jararacuçu urutu caiçaca</i>                                                     | Leve: dor, edema local e equimose discreto                                                                                          | SAB        | 2 - 4 |
|                                                                                                                                |                                                                                                                  | Moderado: dor, edema e equimose evidentes, manifestações hemorrágicas discretas                                                     |            | 4 - 8 |
|                                                                                                                                |                                                                                                                  | Grave: dor e edema intenso e extenso, bolhas, hemorragia intensa, oligoanúria, hipotensão                                           |            | 12    |
|                                                                                                                                | <b>Crotático</b><br><i>cascavel boicininga</i>                                                                   | Leve: ptose palpebral, turvação visual discretos de aparecimento tardio, sem alteração da cor da urina, mialgia discreta ou ausente | SAC        | 5     |
|                                                                                                                                |                                                                                                                  | Moderado: ptose palpebral, turvação visual discretos de início precoce, mialgia discreta, urina escura                              |            | 10    |
| Grave: ptose palpebral, turvação visual evidentes e intensos, mialgia intensa e generalizada, urina escura, oligúria ou anúria |                                                                                                                  | 20                                                                                                                                  |            |       |
| <b>Laquéético</b><br><i>surucuru pico-de-jaca</i>                                                                              | Moderado: dor, edema, bolhas e hemorragia discreta                                                               | SABL                                                                                                                                | 10         |       |
|                                                                                                                                | Grave: dor, edema, bolhas, hemorragia, cólicas abdominais, diarreia, bradicardia, hipotensão arterial            |                                                                                                                                     | 20         |       |
| <b>Elapídico</b><br><i>coral verdadeira</i>                                                                                    | Grave: dor ou parestesia discreta, ptose palpebral, turvação visual                                              | SAEL                                                                                                                                | 10         |       |
| ESCORPIONISMO                                                                                                                  | Leve: dor, eritema e parestesia local                                                                            | SAEsc ou SAA                                                                                                                        | ---        |       |
|                                                                                                                                | Moderado: sudorese, náuseas, vômitos ocasionais, taquicardia, agitação e hipertensão arterial leve               |                                                                                                                                     | 2 - 3      |       |
|                                                                                                                                | Grave: vômitos profusos e incoercíveis, sudorese profusa, prostração, bradicardia, edema pulmonar agudo e choque |                                                                                                                                     | 4 - 6      |       |
| ARANHEISMO                                                                                                                     | Leve: lesão incaracterística sem aranha identificada                                                             | SAA ou SALox                                                                                                                        | ---        |       |
|                                                                                                                                | Moderado: lesão sugestiva com equimose, palidez, eritema e edema enduredo local, cefaléia, febre, exantema       |                                                                                                                                     | 5          |       |
|                                                                                                                                | Grave: lesão característica, hemólise intravascular                                                              |                                                                                                                                     | 10         |       |
| <b>Foneutrismo</b><br><i>aranha-armadeira aranha-da-banana</i>                                                                 | Leve: dor local                                                                                                  | SAA                                                                                                                                 | ---        |       |
|                                                                                                                                | Moderado: sudorese ocasional, vômitos ocasionais, agitação, hipertensão arterial                                 |                                                                                                                                     | 2 - 4      |       |
|                                                                                                                                | Grave: sudorese profusa, vômitos freqüentes, priapismo, edema pulmonar agudo, hipotensão arterial                |                                                                                                                                     | 5 - 10     |       |
| LONOMIA                                                                                                                        | Leve: dor, eritema, adenomegalia regional, coagulação normal, sem hemorragia                                     | SALon                                                                                                                               | ---        |       |
|                                                                                                                                | Moderado: alteração na coagulação, hemorragia em pele e/ou mucosas                                               |                                                                                                                                     | 5          |       |
|                                                                                                                                | Grave: alteração na coagulação, hemorragia em vísceras, insuficiência renal                                      |                                                                                                                                     | 10         |       |

**Informações complementares e observações**

Anotar todas as informações consideradas importantes e que não estão na ficha (ex: outros dados clínicos, dados laboratoriais, laudos de outros exames e necropsia, etc.)

|  |
|--|
|  |
|  |

|              |                            |                        |                |
|--------------|----------------------------|------------------------|----------------|
| Investigador | Município/Unidade de Saúde | Cód. da Unid. de Saúde |                |
|              | Nome                       | Função                 | Assinatura     |
|              | Animais Peçonhentos        | Sinan Net              | SVS 19/01/2006 |

## S.2 - VARIABLES INCLUDED IN THE STATISTICAL ANALYSES

### DESCRIPTIVE STATISTICS (ABSOLUTE NUMBER AND PERCENTAGE):

#### Sociodemographic characteristics

- **Year of occurrence**
  - o 2007, 2008, 2009, 2010, 2011, 2012, 2013, 2014, 2015, 2016, 2017
- **Month of occurrence**
  - o 01 - January (Jan)
  - o 02 - February (Feb),
  - o 03 - March (Mar),
  - o 04 - April (Apr),
  - o 05 - May (May),
  - o 06 - June (Jun),
  - o 07 - July (Jul),
  - o 08 - August (Aug),
  - o 09 - September (Sep),
  - o 10 - October (Oct),
  - o 11 - November (Nov),
  - o 12 - December (Dec)
- **Age range**

*The patient's age was calculated from the date of birth and the date of the accident, generating a continuous variable that was categorized into age groups.*

  - o < 1-year-old to 4-years-old
  - o 5- to 9-years-old
  - o 10- to 14-years-old
  - o 15- to 19-years-old
  - o 20- to 29-years-old
  - o 30- to 39-years-old
  - o 40- to 49-years-old
  - o 50- to 59-years-old
  - o 60- to 69-years-old
  - o 70- to 79-years-old
  - o 80-years-old or more
- **Accident zone**
  - o Urban
  - o Peri-urban
  - o Rural
- **Skin color/Ethnicity**
  - o White
  - o Black
  - o Asian (yellow – East Asians)
  - o Multiracial (“pardo” - mixed ethnic ancestries)
  - o Indigenous (Amerindians)

#### - Education level

*Based in the law and guidelines and bases of Brazilian national education in force during the study period (available at [http://www.planalto.gov.br/ccivil\\_03/Leis/L9394.htm](http://www.planalto.gov.br/ccivil_03/Leis/L9394.htm))*

- o Unlettered
- o Uncomplete primary school
  - 1<sup>st</sup> grade (complete or incomplete),
  - 2<sup>nd</sup> grade (complete or incomplete),
  - 3<sup>rd</sup> grade (complete or incomplete),
  - 4<sup>th</sup> grade (incomplete)
- o Complete primary school
  - 4<sup>th</sup> grade (complete)
- o Uncomplete elementary school
  - 5<sup>th</sup> grade (complete or incomplete),
  - 6<sup>th</sup> grade (complete or incomplete),
  - 7<sup>th</sup> grade (complete or incomplete),
  - 8<sup>th</sup> grade (incomplete)
- o Complete elementary school
  - 8<sup>th</sup> grade (complete)
- o Uncomplete high school
  - 10<sup>th</sup> grade (complete or incomplete)
  - 11<sup>th</sup> grade (complete or incomplete)
  - 12<sup>th</sup> grade (incomplete)
- o Complete high school
  - 12<sup>th</sup> grade (complete)
- o Uncomplete higher education
- o Complete higher education
- o Not applicable
- o Ignored/Omitted

#### Clinical characteristics

##### - Severity

- o Mild - pain, erythema and local paresthesia
- o Moderate - sweating, nausea, occasional vomiting, tachycardia, agitation and mild arterial hypertension
- o Severe - profuse and incoercible vomiting, profuse sweating, prostration, bradycardia, acute pulmonary edema and shock

##### - Sting location

- o Head
- o Arm
- o Forearm
- o Hand
- o Finger
- o Torso
- o Leg
- o Thigh
- o Foot
- o Toe

- **Occurrence of local manifestations**  
Yes or No
- **Occurrence of systemic manifestations**  
Yes or No
- **Serotherapy**  
Yes or No
- **Time between the sting and the medical care**
  - o < 1 hour
  - o 1 to 3 hours
  - o 3 to 6 hours
  - o 6 to 12 hours
  - o 12 to 24 hours
  - o 24 hours

### S.3 STATISTICAL TESTS:

#### 1) Student T-test (unpaired samples):

- **Gender (Female vs. Male cases per year) –**  
p-value: < 0.0001

#### 2) One-way ANOVA (Tukey's multiple comparisons test – post hoc test):

- **Month of occurrence –** p-value: 0.4977

#### 3) Part of a whole - Observed distribution with expected cases comparison:

The expected percentage for the population of Alagoas (Brazil) was obtained from 2010 Brazilian Census.

#### Gender

| Gender | Observed cases | Expected (IBGE, 2010) |
|--------|----------------|-----------------------|
| Male   | 10,693         | 48.45%                |
| Female | 17,295         | 51.55%                |

- **Test:** Binomial Test
- **p-value:** < 0.0001
- **Conclusion:** The discrepancy is significant

#### Age Range

| Age Range            | Observed cases | Expected (IBGE, 2010) |
|----------------------|----------------|-----------------------|
| 1- to 4-years-old    | 2,236          | 8.72%                 |
| 5- to 9-years-old    | 2,399          | 9.62%                 |
| 10- to 14-years-old  | 2,290          | 10.84%                |
| 15- to 19-years-old  | 2,357          | 10.03%                |
| 20- to 29-years-old  | 4,742          | 18.01%                |
| 30- to 39-years-old  | 4,156          | 14.69%                |
| 40- to 49-years-old  | 3,614          | 11.37%                |
| 50- to 59-years-old  | 2,882          | 7.86%                 |
| 60- to 69-years-old  | 1,973          | 5.02%                 |
| 70- to 79-years-old  | 986            | 2.63%                 |
| 80-years-old or more | 353            | 1.23%                 |

- **Test:** Chi-square for goodness of fit
- **Chi-square test:** 908.5
- **Degrees of freedom:** 10
- **p-value:** < 0.0001
- **Conclusion:** The discrepancy is significant

#### Accident Zone

| Accident zone       | Observed cases | Expected (IBGE, 2010) |
|---------------------|----------------|-----------------------|
| Urban               | 26,494         | 73.60%                |
| Peri-urban or Rural | 489            | 26.40%                |

Ignored/Omitted: 1,005 cases

- **Test:** Binomial Test
- **p-value:** < 0.0001
- **Conclusion:** The discrepancy is significant

#### Skin color/Ethnicity

| Skin color/<br>Ethnicity | Observed cases | Expected (IBGE, 2010) |
|--------------------------|----------------|-----------------------|
| White                    | 1,426          | 31.61%                |
| Black                    | 1,243          | 6.57%                 |
| Asian                    | 16             | 1.18%                 |
| Multiracial              | 24,858         | 60.18%                |
| Indigenous               | 25             | 0.46%                 |

- **Test:** Chi-square for goodness of fit
- **Chi-square test:** 10770
- **Degrees of freedom:** 4
- **p-value:** < 0.0001
- **Conclusion:** The discrepancy is significant

**4) Chi-square test for independence:**

**Systemic manifestations vs:**

**Not Included** (Variables whose expected count value of one fifth of categories was less than 5):

- Skin color/Ethnicity - 20% of expected counts were < 5
- Accident zone - 16,7% of expected counts were < 5
- Evolution - 66.7% of expected counts were < 5

**Included**

**No association with the occurrence of systemic manifestations (p-value > 0.05)**

**- Sting location:**

- $\chi^2 = 15.480$
- Degrees of freedom: 9
- p-value = 0.079

**- Gender:**

- $\chi^2 = 0.053$
- Degrees of freedom: 1
- p-value = 0.819

**Association with systemic manifestations:**

**Age range (years):**

- $\chi^2 = 1007.956$
- Degrees of freedom: 11
- p-value < 0.0001

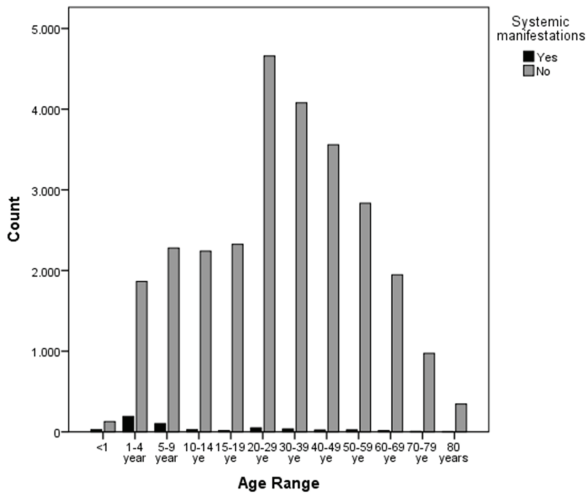

**Time between the sting and the medical care:**

- $\chi^2 = 98.832$
- Degrees of freedom: 5
- p < 0.0001

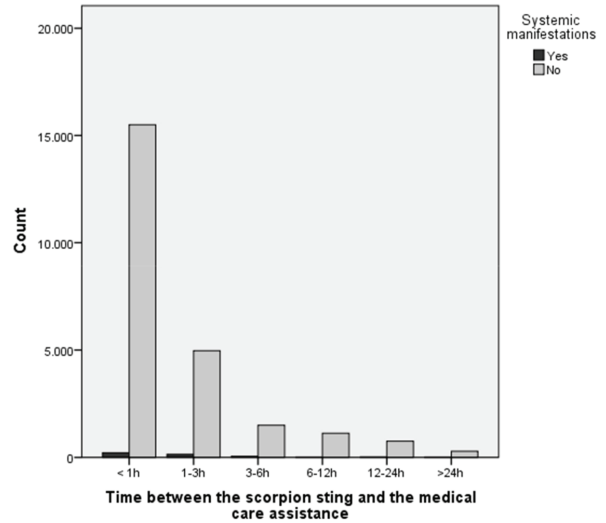

**Association of Severity with Age Range**

- $\chi^2 = 1328.604$
- Degrees of freedom: 22
- p < 0.0001

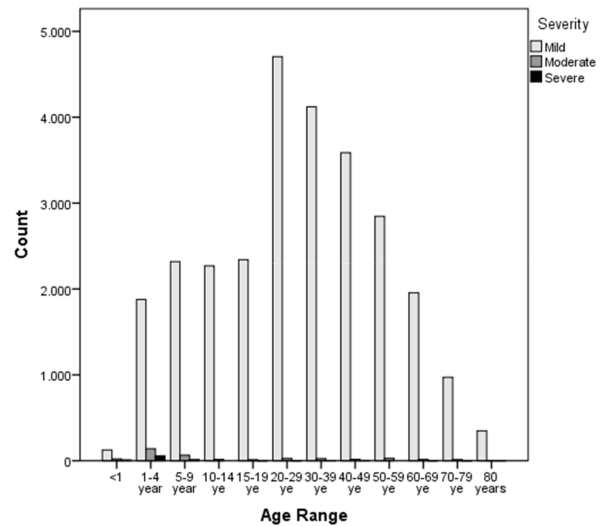

Supplement: 1678-9946-rimtsp-62-S1678-9946202062026-suppl01.pdf [file 1678-9946-rimtsp-62-S1678-9946202062026-suppl01.pdf]
